# Supplementary material for: Comparison of Renal Effects of Ezetimibe–Statin Combination versus Statin Monotherapy: A Propensity-Score-Matched Analysis
Source: MDPI journal article supplement (doi:10.3390/jcm9030798), 2020-03-15
Supplement: s1 [file s1]

**Figure S1. Standardized mean difference and absolute standardized difference for covariates before and after propensity matching of patients treated with simvastatin+ezetimibe or simvastatin alone. (A) standardized mean difference, (B) absolute standardized difference**

**A**

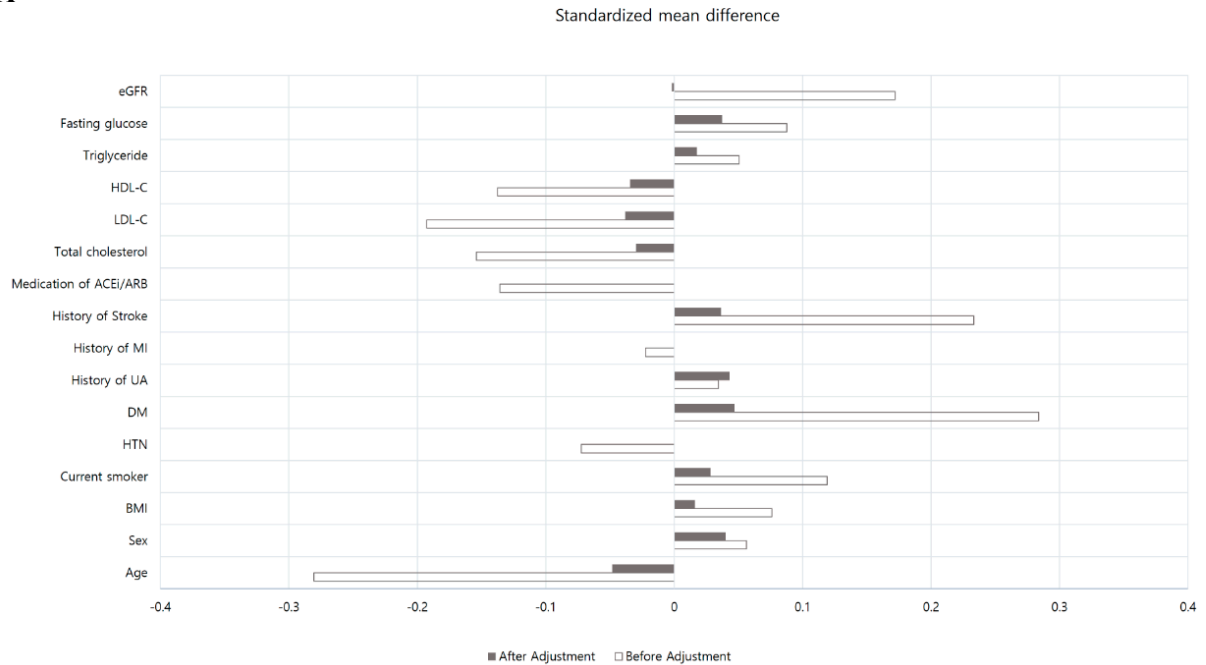

**B**

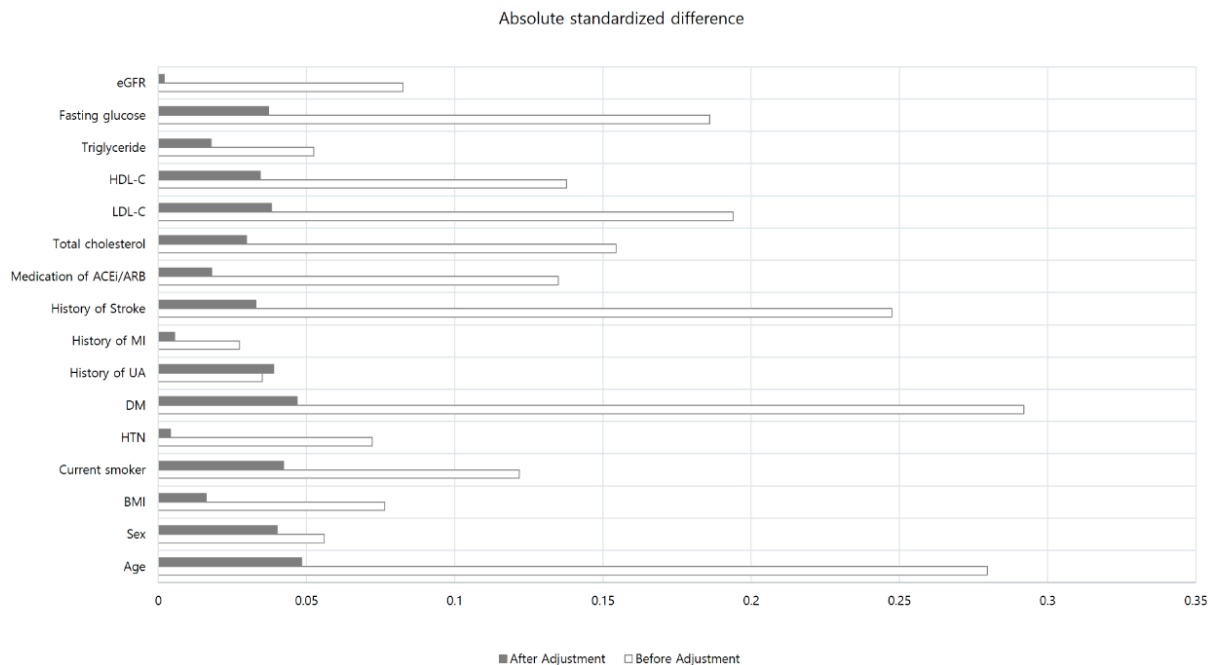

eGFR, estimated glomerular filtration rate; HDL-C, high density lipoprotein cholesterol; LDL-C, low density lipoprotein cholesterol; ACEi/ARB, angiotensin converting enzyme inhibitor or angiotensin receptor blocker; MI, myocardial infarction; UA, unstable angina; DM, diabetes mellitus; HTN, Hypertension; BMI, body mass index.

**Figure S2. The flow chart of the retrospective cohort study**

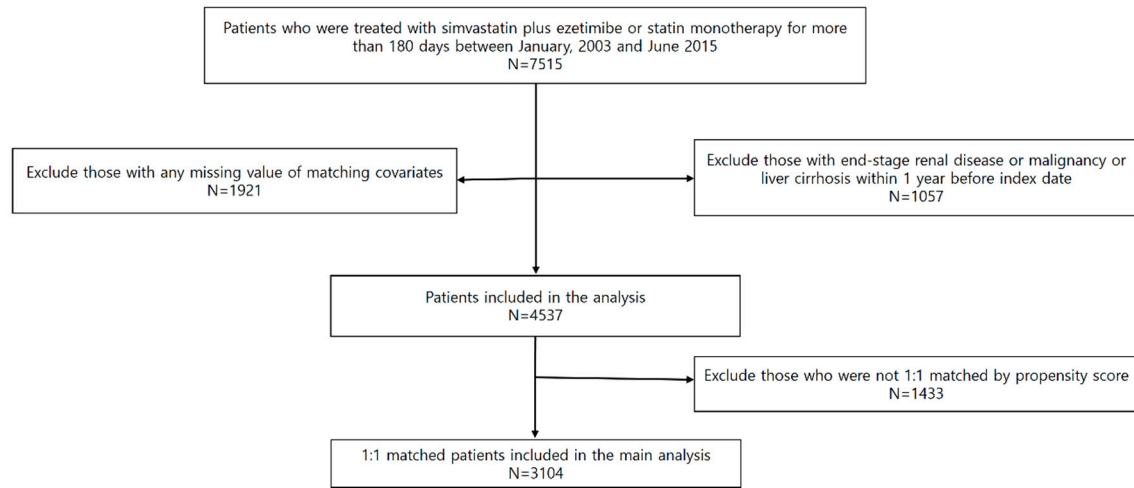

**Table S1. Baseline Characteristics of Treatment Groups Before Propensity Score Matching**

|                                                  | S+E (N=2895)  | S (N=1642)   | P-value |
|--------------------------------------------------|---------------|--------------|---------|
| Age, years                                       | 66.4 ± 10.5   | 69.4 ± 11.2  | <0.001  |
| Men, n (%)                                       | 1419 (49.0)   | 851 (51.8)   | 0.07    |
| BMI, kg/m <sup>2</sup>                           | 24.7 ± 3.1    | 24.5 ± 3.2   | 0.01    |
| Current smoker, n (%)                            | 513 (17.7)    | 219 (13.3)   | <0.001  |
| Obesity n, (%) <sup>1</sup>                      | 1212 (41.9)   | 650 (39.6)   | 0.13    |
| HTN n, (%)                                       | 1329 (45.9)   | 813 (49.5)   | 0.02    |
| DM n, (%)                                        | 1006 (34.7)   | 357 (21.7)   | <0.001  |
| CKD stage 1, n (%) <sup>2</sup>                  | 1085 (37.5)   | 533 (32.5)   | 0.001   |
| CKD stage 2, n (%) <sup>3</sup>                  | 840 (29.0)    | 465 (28.3)   | 0.62    |
| CKD stage 3, n (%) <sup>4</sup>                  | 901 (31.1)    | 605 (36.8)   | <0.001  |
| CKD stage 4, n (%) <sup>5</sup>                  | 69 (2.4)      | 39 (2.4)     | 0.99    |
| History of UA, n (%)                             | 171 (5.9)     | 84 (5.1)     | 0.27    |
| History of MI, n (%)                             | 94 (3.2)      | 60 (3.7)     | 0.47    |
| History of Stroke, n (%)                         | 430 (14.9)    | 119 (7.2)    | <0.001  |
| Medication of aspirin, n (%)                     | 1794 (62.0)   | 1030 (62.7)  | 0.61    |
| Medication of $\beta$ -blocker, n (%)            | 1051 (36.3)   | 691 (42.1)   | <0.001  |
| Medication of CCB, n (%)                         | 1176 (40.6)   | 720 (43.8)   | 0.03    |
| Medication of ACEi/ARB, n (%)                    | 1210 (41.8)   | 797 (48.5)   | <0.001  |
| Proteinuria, n (%) <sup>6,7</sup>                | 88 (8.5)      | 66 (8.8)     | 0.79    |
| Total cholesterol, mg/dL                         | 181.9 ± 50.9  | 189.8 ± 50.7 | <0.001  |
| LDL-C, mg/dL                                     | 102.4 ± 42.4  | 110.5 ± 41.6 | <0.001  |
| HDL-C, mg/dL                                     | 47.9 ± 12.2   | 49.6 ± 12.3  | <0.001  |
| Triglyceride, mg/dL                              | 149.1 ± 111.2 | 143.9 ± 86.1 | 0.08    |
| Fasting glucose, mg/dL                           | 110.1 ± 30.6  | 107.4 ± 30.0 | 0.005   |
| HbA1c, % <sup>8</sup>                            | 7.1 ± 1.5     | 6.9 ± 1.4    | 0.24    |
| Creatinine, mg/dL                                | 0.9 ± 0.3     | 1.0 ± 0.3    | <0.001  |
| eGFR, mL/min per 1.73m <sup>2</sup> <sup>9</sup> | 81.4 ± 33.8   | 75.7 ± 30.6  | <0.001  |

Continuous variables expressed as means + standard deviation (SD); categorical variables expressed as number (percent).

Abbreviations: S, simvastatin; S+E, simvastatin+ezetimibe; BMI, body mass index; HTN, hypertension; DM, diabetes mellitus; CKD, chronic kidney disease; UA, unstable angina; MI, myocardial infarction; CCB, calcium channel blocker; ACE, angiotensin converting enzyme; ARB, angiotensin receptor blocker; LDL-C, low density lipoprotein cholesterol; HDL-C, high density lipoprotein cholesterol; HbA1c, glycated hemoglobin; eGFR, estimated glomerular filtration rate.

<sup>1</sup> Defined as  $\text{BMI} \geq 25 \text{ kg/m}^2$

<sup>2</sup> Defined as  $\text{eGFR} \geq 90 \text{ mL/min per } 1.73\text{m}^2$

<sup>3</sup> Defined as  $60 \leq \text{eGFR} < 90 \text{ mL/min per } 1.73\text{m}^2$

<sup>4</sup> Defined as  $30 \leq \text{eGFR} < 60 \text{ mL/min per } 1.73\text{m}^2$

<sup>5</sup> Defined as  $15 \leq \text{eGFR} < 30 \text{ mL/min per } 1.73\text{m}^2$

<sup>6</sup> Defined as qualitative urine protein test  $\geq 1+$

<sup>7</sup> Relatively small number of evaluable patients (S+E, 1038; S, 747). Calculated as patients with proteinuria/patients with urinalysis

<sup>8</sup> Relatively small number of evaluable patients (S+E, 323; S, 238).

<sup>9</sup> Calculated using MDRD equation.
